# Supplementary material
Source: ML conference proceedings conference paper supplement (https://aclanthology.org/2020.acl-main.319)
Supplement: Software [file 2020.acl-main.319.Software.zip]

Archive with 17 entries (17 files):
- analysis.tex
- approach.tex
- background.tex
- appendix.tex
- experiments.tex
- introduction.tex
- main.tex
- reference.bib
- related_work.tex
- acl2020.sty
- acl_natbib.bst
- acl2020.bib
- pictures/acl2019.pdf
- pictures/output.pdf
- pictures/timecost.pdf
- pictures/overview.pdf
- pictures/pattern.pdf
