# Supplementary material
Source: ML conference proceedings conference paper supplement (https://aclanthology.org/2020.acl-main.319)

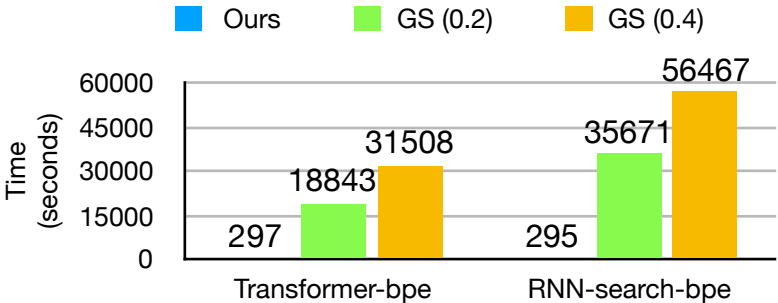

Supplement: Software [file 2020.acl-main.319.Software.zip › pictures/timecost.pdf]

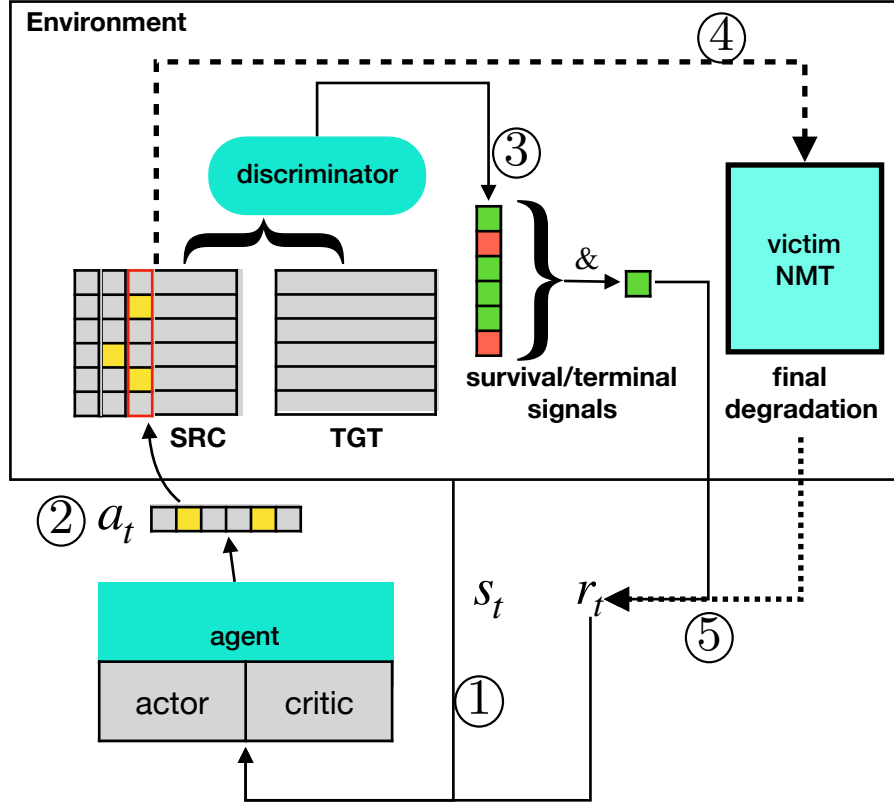

(a) Overview

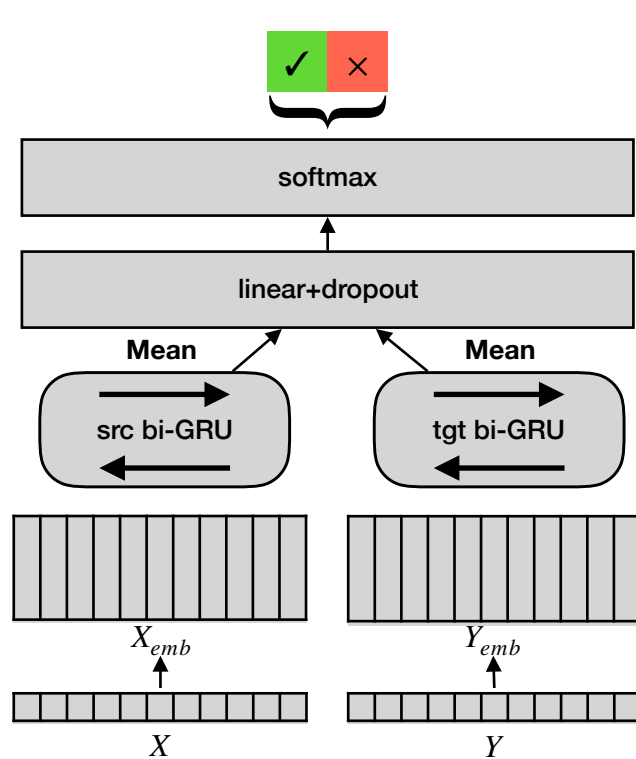

(b) Discriminator

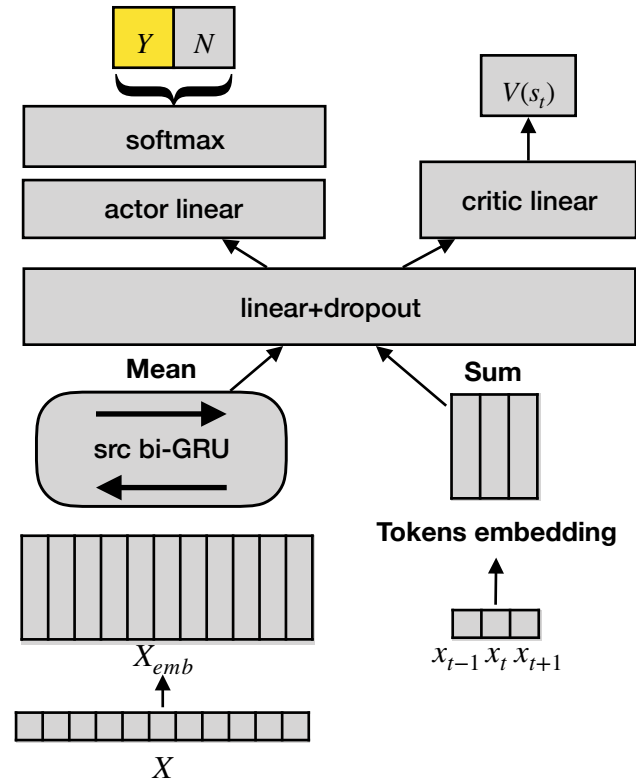

(c) Agent

Supplement: Software [file 2020.acl-main.319.Software.zip › pictures/overview.pdf]

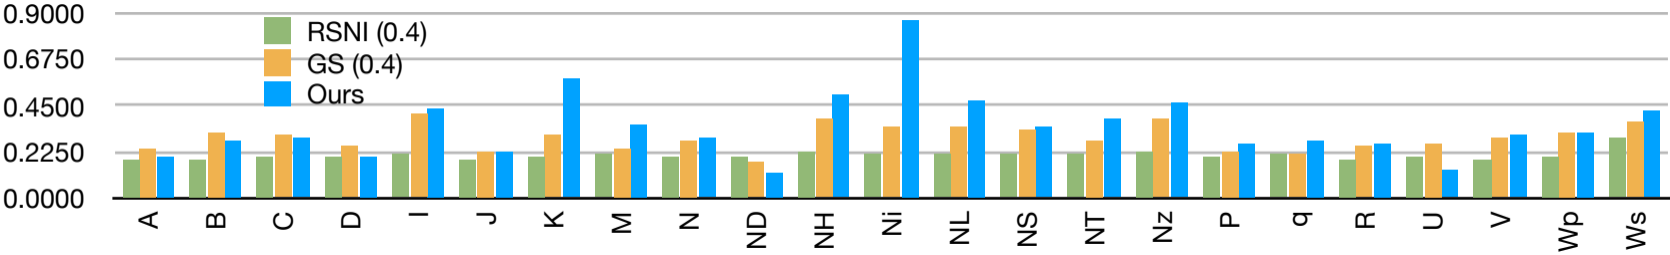

Supplement: Software [file 2020.acl-main.319.Software.zip › pictures/pattern.pdf]
